# Supplementary material
Source: Springer Nature journal article supplement (https://www.springermedizin.de/resource/supplementary/13722_2011_8_MOESM2_ESM.pdf/9674888)

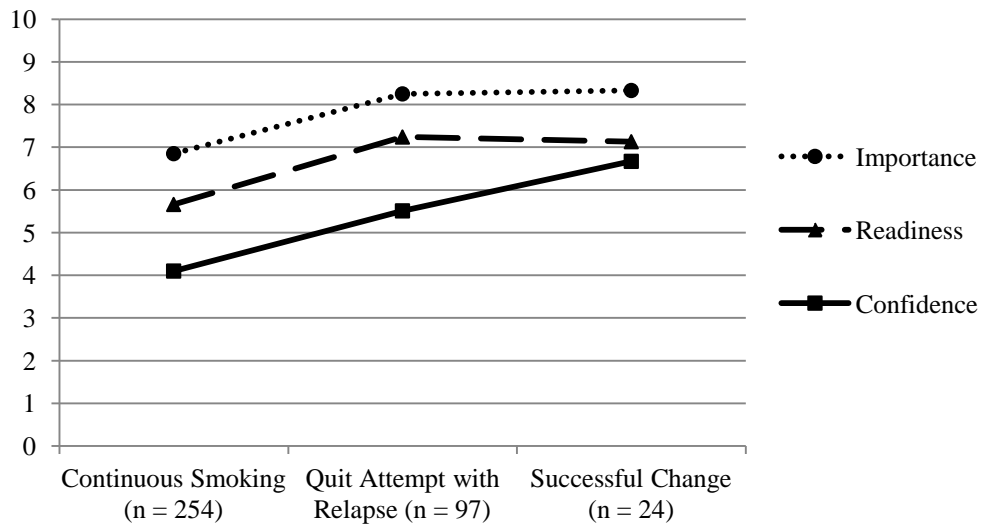

Supplement: MOESM2 [file 9674888]
